# Supplementary material for: Impact of free maternity policies in Kenya: an interrupted time-series analysis
Source: HighWire-hosted journal article supplement (doi:10.1136/bmjgh-2020-003649), 2021-06-01
Supplement: bmjgh-2020-003649supp006_data_supplement.pdf [file bmjgh-2020-003649supp006_data_supplement.pdf]

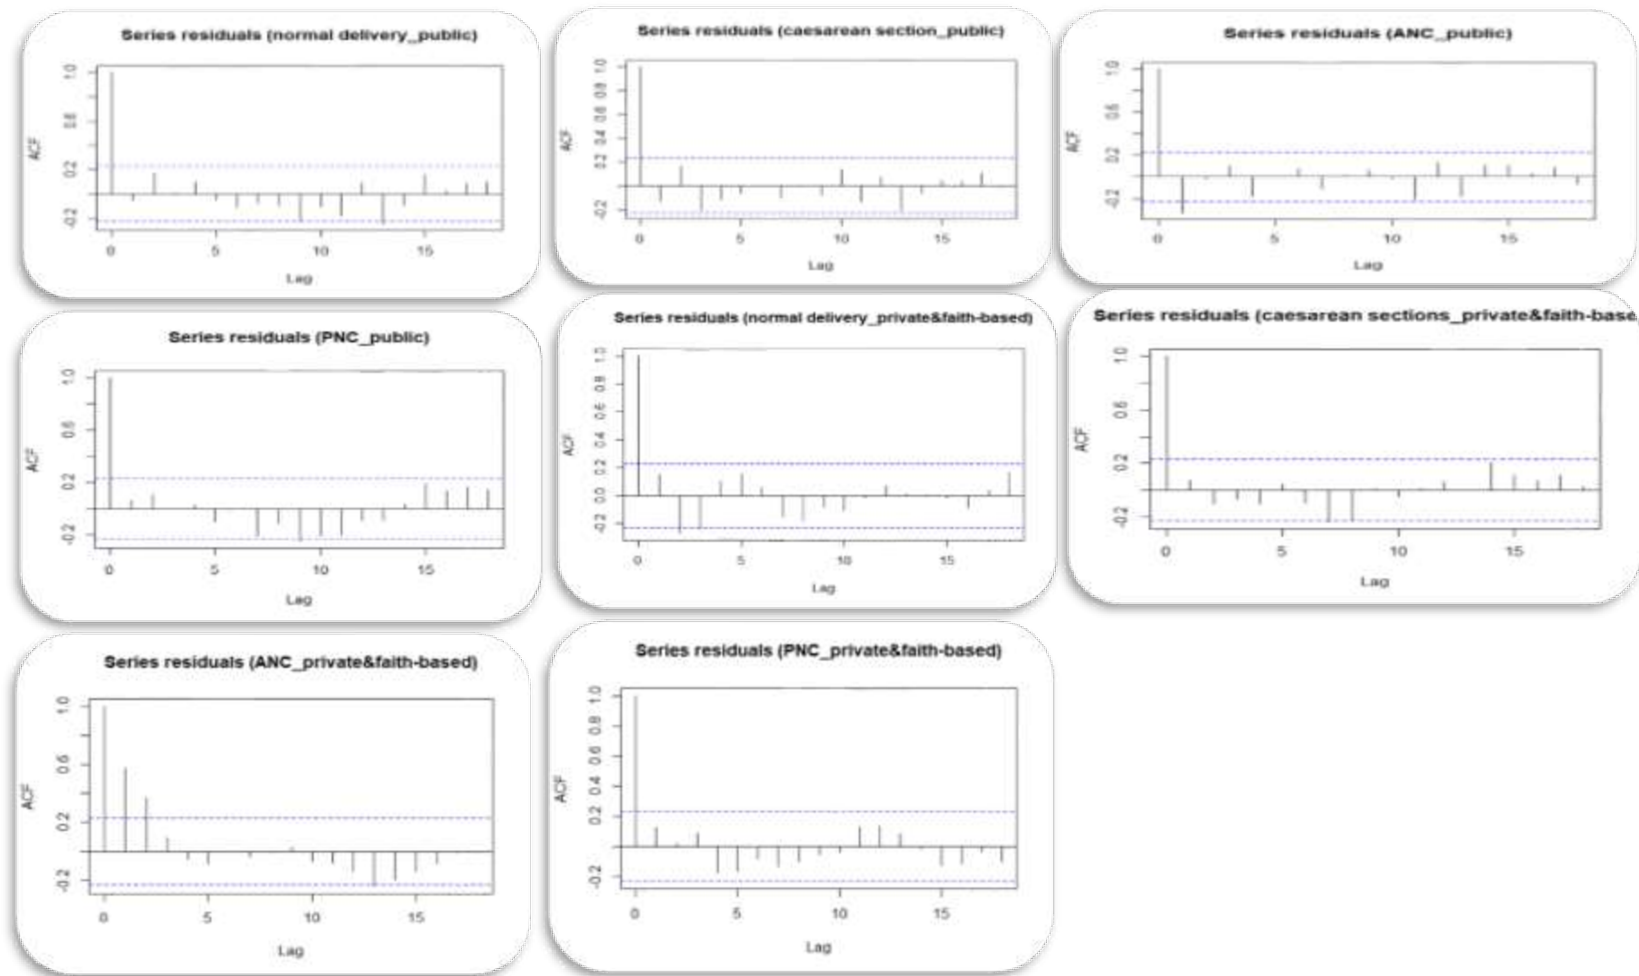

Supplementary Figure 3: Autocorrelation function (ACF) plots for the ITS in public, private and faith-based facilities
